# Supplementary material for: A vinylene-linked diketopyrrolopyrrole-based covalent organic framework for photocatalytic oxidation reactions
Source: Royal Society of Chemistry journal article supplement (doi:10.1039/d4cc06615d), 2025-01-01
Supplement: d4cc06615d1.pdf [file d4cc06615d1.pdf]

Supporting Information For  
**Vinylene-linked Diketopyrrolopyrrole Covalent Organic Framework for  
Photocatalytic Oxidation Reactions**

Wei Zhao,<sup>a</sup> Jing-Lan Kan,<sup>a</sup> Chaowei Zhao,<sup>\*b</sup> Yuan Guo,<sup>c</sup> Fan Yang<sup>\*a</sup> and Yu-Bin Dong<sup>a</sup>

<sup>a</sup> College of Chemistry, Chemical Engineering and Materials Science, Collaborative Innovation Center of Functionalized Probes for Chemical Imaging in Universities of Shandong, Key Laboratory of Molecular and Nano Probes, Ministry of Education, Shandong Normal University, Jinan 250014, P. R. China. Email: [yangfan1180@sdu.edu.cn](mailto:yangfan1180@sdu.edu.cn)

<sup>b</sup> Laboratory of Jiangxi Province for Environment and Energy Catalysis, Institute of Applied Chemistry, Jiangxi Academy of Sciences, Nanchang 330096, China. Email: [cwzhao114@163.com](mailto:cwzhao114@163.com)

<sup>c</sup> School of Light Industry and Engineering, Qilu University of Technology (Shandong Academy of Sciences), Jinan 250353, China.

## **Contents**

1. Materials and Measurements (page S3-S4)
2. Synthesis of Intermediate Products and Monomer (page S4-S7)
3. Simulated and Experimental Structure of DPP-COF (page S7)
4. TGA Curve (page S8)
5. TEM Images (page S8)
6. Mott-Schottky Plots and Bands Potentials (page S9)
7. Photocurrent Response Curve (page S9)
8. Photocatalytic Experiments (page S10-S22)
9. Crystallographic Parameters (page S22-S24)
10. References (page S24-S25)

## 1. Materials and Measurements

All the solvents, intermediate chemicals and catalysts are commercially available from local chemical distributors, and used without further purification.

$^1\text{H-NMR}$  and  $^{13}\text{C-NMR}$  spectra of intermedia products, monomers and photocatalytic products were individually recorded at 400/100 MHz on a Bruker Avance spectrometer with tetramethylsilane (TMS) as the internal standard. Powder X-ray diffraction (PXRD) data were collected using a D8 ADVANCE X-ray with Cu  $K\alpha$  radiation ( $\lambda = 1.5405 \text{ \AA}$ ). Transform Infrared (FT-IR) spectra in the region of 400-4000  $\text{cm}^{-1}$  were obtained with a Perkin-Elmer 1600 FT-IR spectrometer. Solid state  $^{13}\text{C}$  CP-MAS spectrum was acquired at BRUKER AVANCE NEO 400WB.  $\text{N}_2$  adsorption-desorption isotherm was obtained using an ASAP 2020/TriStar 3000 (Micromeritics) apparatus measured at 77 K, the sample was degassed at 100  $^\circ\text{C}$  for 12 h under high vacuum before analysis. High resolution transmission electron microscopy (TEM) images and HAADF-STEM images were obtained using TEM (Talos F200X). The corresponding elemental mapping images were obtained by using Talos F200i. Ultraviolet-visible (UV-vis) absorption spectra was recorded on a Shimadzu UV-2600 Double Beam UV-vis Spectrophotometer. Mott-Schottky measurement was performed in  $\text{Na}_2\text{SO}_4$  solution (0.5M) on a CHI660E electrochemical workstation in a three-electrode system. The working electrode was prepared by dropcasting an 5% Nafion (50  $\mu\text{L}$ ) suspension of COF (0.2 mg) and carbon black (0.7 mg) onto a glassy carbon electrode. The auxiliary electrode and reference electrode were platinum-wire and Ag/AgCl, Mott-Schottky plots were measured at alternating current frequencies of 2000 Hz, 2500 Hz and 3000 Hz. Chenhua electrochemical workstation (CHI660D Instruments, Shanghai Chenhua Instrument Co., Ltd., Shanghai, China) was used to measure the photocurrent. Thermogravimetric analysis (TGA) was performed on a TGA/DSC 3+ in the temperature range of 30-800  $^\circ\text{C}$  under a nitrogen atmosphere and a heating rate of 10  $^\circ\text{C}/\text{min}$ . Electron paramagnetic resonance (EPR) spectra was measured by Bruker A300 EPR Spectroscopy. The apparent quantum yields (AQY) were calculated according to the formula:  $\text{AQY (100\%)} = (M_{(\text{product})} * N_A * h * c) / (P * S * t * \lambda) * 100\%$ , where the  $M_{(\text{product})}$  is the mole number of

product,  $N_A$  is Avogadro constant,  $h$  is Planck constant,  $c$  is speed of light,  $P$  (the light power intensity) is 633 W/m<sup>2</sup>,  $S$  (irradiation area) is 1.5 cm<sup>2</sup>,  $t$  is irradiation time,  $\lambda$  is 460 nm.

## 2. Synthesis of Intermediate Products and Monomer

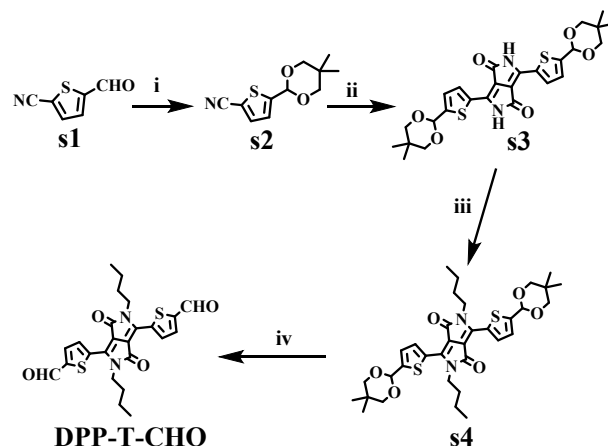

**Scheme S1** Synthesis procedure of monomer DPP-T-CHO. i: Neopentyl glycol, *p*-Toluenesulfonic acid monohydrate, toluene, 113 °C; ii: Diethyl succinate, *t*-BuONa, tert-Amyl alcohol, 100 °C; iii: 1-Bromobutane, K<sub>2</sub>CO<sub>3</sub>, 18-crown-6, DMF, 110 °C; iv: 1M HCl, THF, 75 °C.

**s2:** To a 100 mL pressure tube was charged with 5-formylthiophene-2-carbonitrile (s1, 6.0 g, 43.7 mmol), Neopentyl glycol (5.5 g, 52.5 mmol), *p*-Toluenesulfonic acid monohydrate (249.6 mg, 1.3 mmol) and 25 mL toluene. Then the reaction was executed in nitrogen atmosphere overnight at 113 °C. After cooling to room temperature, the solution was poured into water and extracted three times with ethyl acetate to collect the organic phase. Subsequently, the organic phase was dried and the solvent was removed in vacuo. The crude product was purified by silica gel chromatography (Petroleum ether as eluent) to obtain 9.2 g s2 as a white powder with 94.5% of yield. <sup>1</sup>H-NMR (CDCl<sub>3</sub>, 400 MHz):  $\delta$ (ppm) 7.52-7.51 (d,  $J$  = 4.0 Hz, 1H), 7.12-7.10 (d,  $J$  = 8.0Hz, 1H), 5.61 (s, 1H), 3.77-3.74 (d,  $J$  = 12.0 Hz, 2H), 3.65-3.62 (d,  $J$  = 12.0 Hz, 2H), 1.25 (s, 3H), 0.81 (s, 3H). <sup>13</sup>C-NMR (CDCl<sub>3</sub>, 100 MHz):  $\delta$ (ppm): 149.22, 137.11, 125.16, 114.26, 109.76, 97.17, 30.26, 22.89, 21.76. HR-MS:  $m/z$  [M+H]<sup>+</sup> calcd for C<sub>11</sub>H<sub>14</sub>NO<sub>2</sub>S: 224.0745, found: 224.0743.

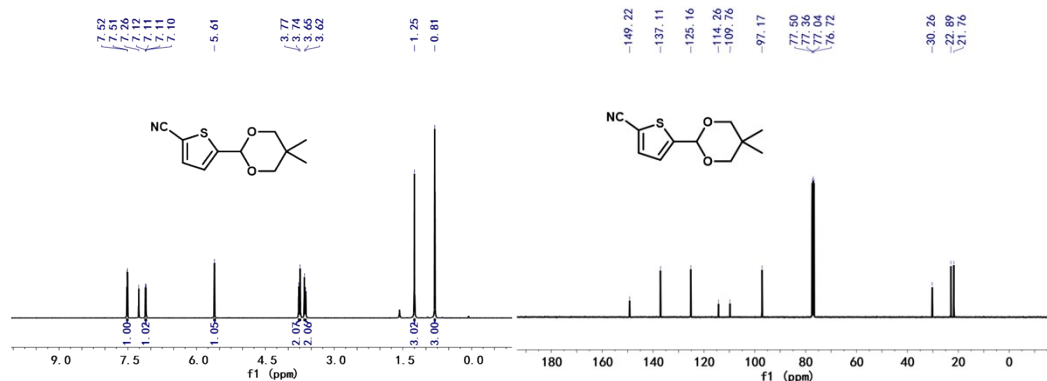

**Fig. S1** The  $^1\text{H}$ -NMR (left) and  $^{13}\text{C}$ -NMR spectra of **s2**.

**s3:** In  $\text{N}_2$  atmosphere, Sodium tert-butoxide (6.5g, 68.0 mmol) was dissolved in 40 mL tert-Amyl alcohol and stirred at  $100^\circ\text{C}$  for 1h. After that, 5-(5,5-dimethyl-1,3-dioxan-2-yl)thiophene-2-carbonitrile (**s2**, 9.5 g, 42.5 mmol) was added. Then Diethyl succinate (2.96g, 17.0 mmol) was dissolved in 20 mL tert-Amyl alcohol and dropwised into the reaction solution with a constant pressure dropping funnel. Subsequently, the resulting suspension was strongly stirred at  $100^\circ\text{C}$  for 24 hours. After cooling to room temperature, glacial acetic acid (30 mL) and methanol (300 mL) were added into the reaction system, and the mixture was stirred at  $55^\circ\text{C}$  for another 2 h. Then the mixture was filtered, washed several times with methanol and water, and dried in vacuo to give 2.2 g crude **s3** as black-red solid without any purification.

**s4:** To a 100 mL pressure tube was added **s3** (600.0 mg, 1.1 mmol), 1-Bromobutane (388.8 mg, 2.9 mmol),  $\text{K}_2\text{CO}_3$  (470.6mg, 3.4 mmol), catalyst 18-crown-6 (45.0 mg, 0.17 mmol) and 25 mL DMF. The reaction system was degassed-inflated with  $\text{N}_2$  5 times and reacted at  $110^\circ\text{C}$  overnight. After that, the solution was poured into water and extracted three times with dichloromethane to obtain organic phase. The organic phase was dried, condensed and purified via silica gel chromatography (dichloromethane as eluent) to obtain 377.0 mg **s4** as dark red solid, and the total yield from **s2** to **s4** is 12.7%.  $^1\text{H}$ -NMR ( $\text{CDCl}_3$ , 400 MHz):  $\delta$ (ppm) 8.86-8.85 (d,  $J = 4.0$  Hz, 2H), 7.27-7.26 (d,  $J = 4.0$  Hz, 2H), 5.69 (s, 2H), 4.10-4.06 (t,  $J = 16.0$  Hz, 4H), 3.80-3.77 (d,  $J = 12.0$  Hz, 4H), 3.67-3.65 (d,  $J = 8.0$  Hz, 4H), 1.73-1.69 (m,  $J = 24.0$  Hz, 4H), 1.59(s, 2H), 1.47-1.41 (m, 4H), 1.28 (s, 6H), 0.98-0.94 (t,  $J=16.0\text{Hz}$ , 6H), 082 (s, 6H).  $^{13}\text{C}$ NMR

(CDCl<sub>3</sub>, 100 MHz):  $\delta$ (ppm) 161.40, 146.80, 135.23, 129.76, 126.48, 108.04, 97.86, 41.96, 30.31, 20.19, 13.74. HR-MS:  $m/z$  [M+Na]<sup>+</sup> calcd for C<sub>34</sub>H<sub>44</sub>N<sub>2</sub>NaO<sub>6</sub>S<sub>2</sub>: 663.2538, found: 663.2531.

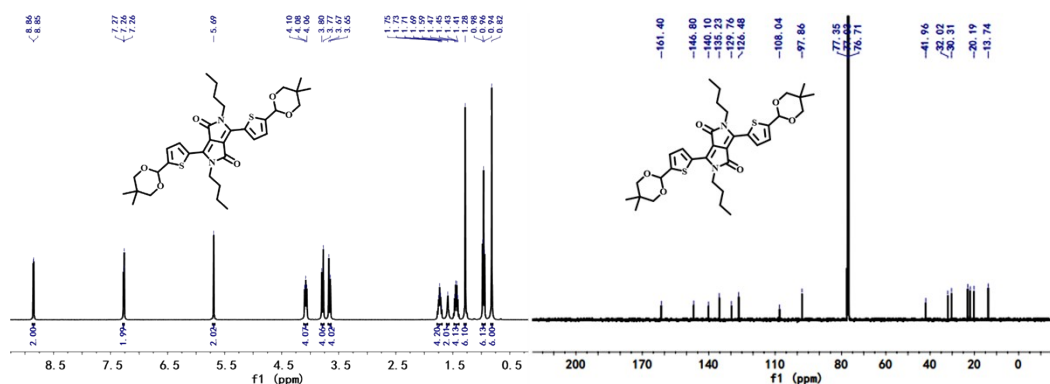

**Fig. S2** The <sup>1</sup>H-NMR (left) and <sup>13</sup>C-NMR spectra of **s4**.

**DPP-T-CHO:** To a 250 mL round-bottom flask was added 300.0 mg **s4**, 80 mL THF and 3 mL HCl aqueous solution (1 M). The solution was refluxed for 3 hours and then poured into water. Purple solid was collected by filtration, and pure DPP-T-CHO was obtained via silica gel chromatography with dichloromethane as eluent (200.0 mg, 91% of yield). <sup>1</sup>H-NMR (CDCl<sub>3</sub>, 400 MHz):  $\delta$ (ppm) 10.04 (s, 2H), 9.11-9.10 (d,  $J$  = 4.0 Hz, 2H), 7.89-7.88 (d,  $J$  = 4.0 Hz, 2H), 4.14-4.11 (t,  $J$  = 12.0 Hz, 4H), 1.75-1.71(m, 4H), 1.49-1.43 (m, 4H), 1.00-0.96 (t,  $J$ =16.0Hz, 6H). <sup>13</sup>C-NMR (CDCl<sub>3</sub>, 100 MHz):  $\delta$ (ppm) 182.84, 146.62, 140.01, 136.19, 136.18, 100.00, 42.24, 32.14, 20.13, 13.73. HR-MS:  $m/z$  [M+H]<sup>+</sup> calcd for C<sub>24</sub>H<sub>25</sub>N<sub>2</sub>O<sub>4</sub>S<sub>2</sub>: 469.1256, found: 469.1255.

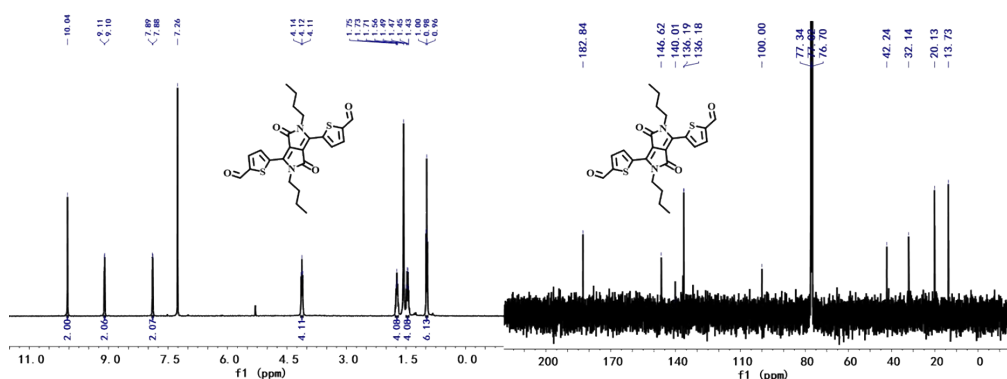

**Fig. S3** The <sup>1</sup>H-NMR (left) and <sup>13</sup>C-NMR spectra of **DPP-T-CHO**.

**DPP-COF:** To a 10 mL Pyrex tube was added DPP-T-CHO (52.7mg, 0.1125 mmol), 2,4,6-trimethyl-1,3,5-triazine (TMT, 9.2 mg, 0.075 mmol), benzoic anhydride (67.87 mg, 0.3 mmol)

and benzoic acid (36.6 mg, 0.3 mmol). Then, the tube was sealed and heated at 190 °C for 3 days. After reaction, a dark black powder was collected by sucking filtration and thoroughly washed with acetone, anhydrous ethanol, tetrahydrofuran, and dichloromethane, respectively. The collected sample was dried under vacuum at 120 °C for 24 h to give a dark black powder (55.3 mg, 95.5 % of yield).

### 3. Simulated and Experimental Structure of DPP-COF

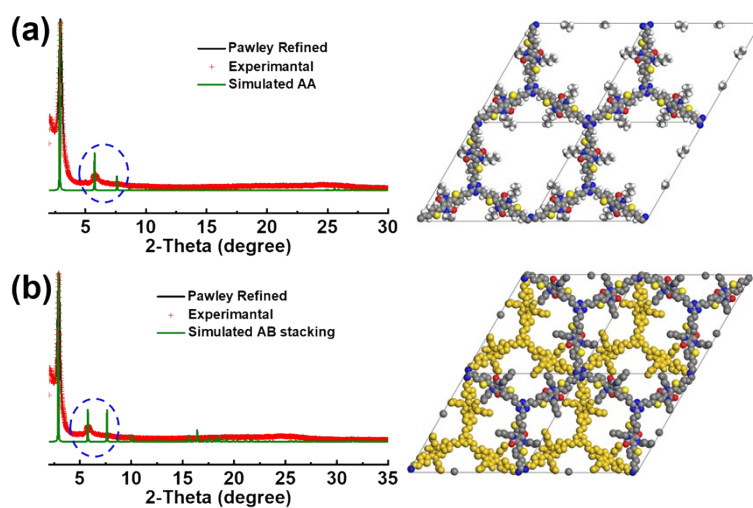

**Fig. S4** The simulated and experimental PXRD pattern of (a) AA and (b) AB stacking model with corresponding stacking structures.

## 4. TGA Curve

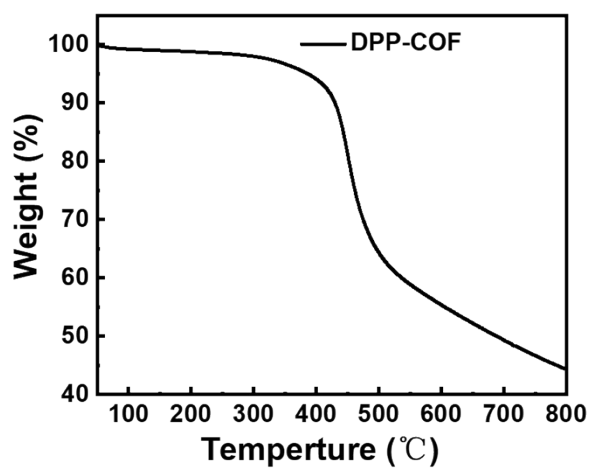

Fig. S5 TGA curve of DPP-COF.

## 5. TEM Images

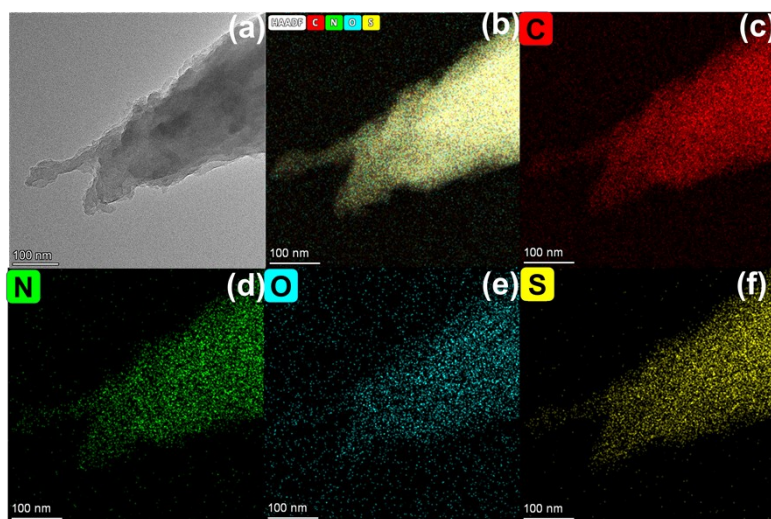

Fig. S6 HAADF-STEM image and corresponding elemental mapping images of DPP-COF.



## 6. Mott-Schottky Plots and Band Potentials

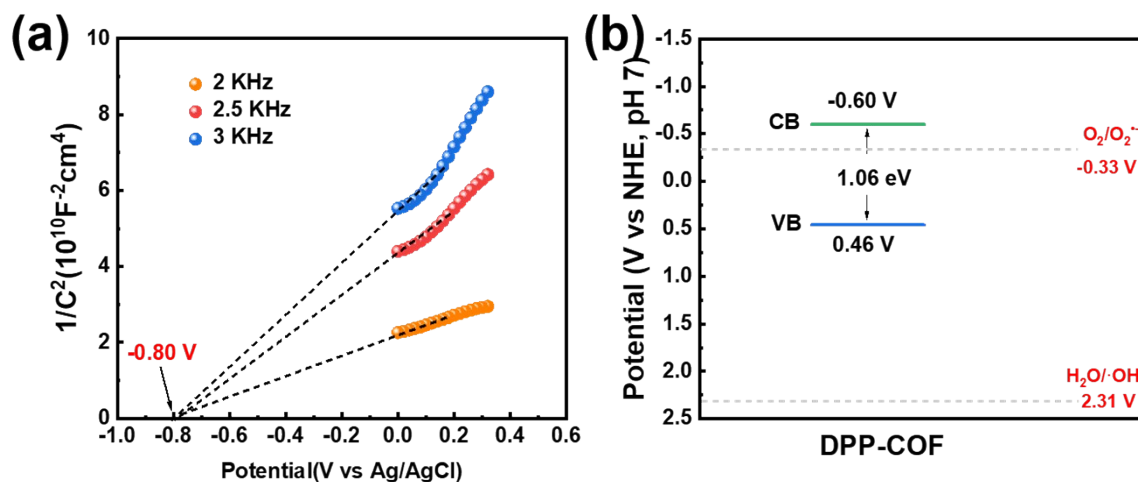

**Fig. S7** (a) Mott-Schottky plots of DPP-COF, and the band potential was calculated according to the formula:  $E(NHE) = E(Ag/AgCl) + 0.197$ . (b) The bands potentials.

## 7. Photocurrent Response Curve

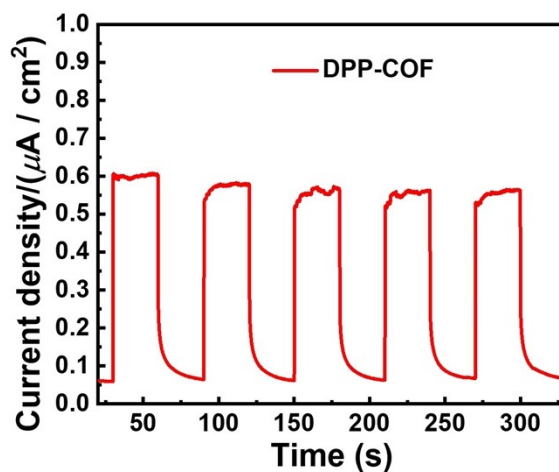

**Fig. S8** Photocurrent response curve of DPP-COF.

## 8. Photocatalytic Experiments

### 8.1 General Procedure for Photocatalytic Oxidation Reaction

**Photooxidation of sulfides:** A 10 mL quartz tube was charged with reaction substrate (0.3 mmol), COF photocatalyst (10 mg), solvent (3 mL). The mixture was bubbled with oxygen and stirred, then the tube was irradiated with a 10 W blue LED lamp (460 nm) in room temperature. After reaction, the solution was centrifuged and the solvent was removed by rotary evaporation. Yields were determined by <sup>1</sup>H-NMR spectroscopy with 0.3 mmol diphenylacetonitrile (DPAT) as internal standard. The isolated yield was obtained by purifying the solution by silica gel flash chromatography (Petroleum ether : ethyl acetate, v/v = 1 : 1 as eluent).

**Photooxidation of THIQs:** A 10 mL quartz tube was charged with reaction substrate (0.3 mmol), COF photocatalyst (10 mg), CH<sub>3</sub>CN (3 mL). The mixture was placed in air atmosphere and stirred, then the tube was irradiated with a 10 W blue LED lamp (460 nm) in room temperature. After reaction, the solution was centrifuged and the solvent was removed by rotary evaporation. Yields were determined by <sup>1</sup>H-NMR spectroscopy with 0.3 mmol diphenylacetonitrile (DPAT) as internal standard. The isolated yield was obtained by purifying the solution by silica gel flash chromatography (Petroleum ether : dichloromethane, v/v = 1 : 1 as eluent).

### 8.2 Photocatalytic oxidation of sulfides

#### 8.2.1 Yield of 2a Determined by <sup>1</sup>H-NMR Analysis

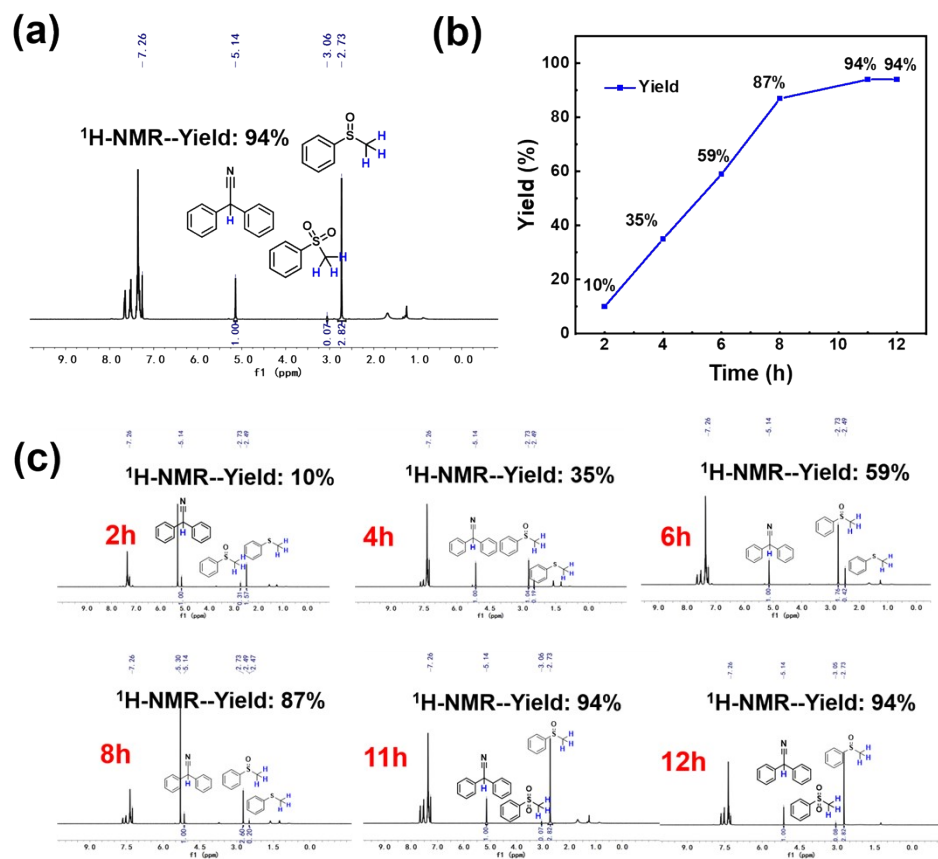

**Fig. S9** (a) Yield of model oxidation reaction determined by  $^1\text{H-NMR}$  spectra. (b, c) Reaction time examination of **2a** based on DPP-COF as photocatalyst with corresponding  $^1\text{H-NMR}$  spectra.

**2a**:  $^1\text{H-NMR}$  ( $\text{CDCl}_3$ , 400 MHz):  $\delta$  (ppm) 7.67-7.65 (t,  $J = 8.0$  Hz, 2H), 7.56-7.50 (m, 3H), 2.73 (s, 3H).  $^{13}\text{C-NMR}$  ( $\text{CDCl}_3$ , 100 MHz):  $\delta$  (ppm) 145.77, 131.03, 129.36, 123.49, 43.97.

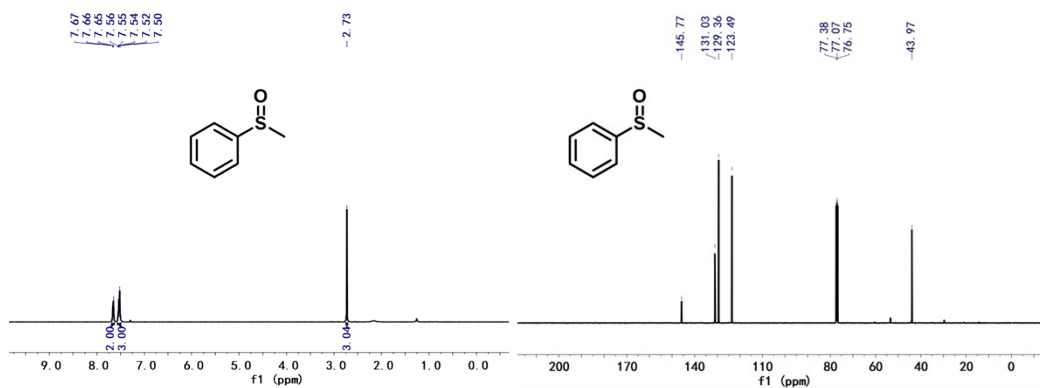

**Fig. S10**  $^1\text{H-NMR}$  (left) and  $^{13}\text{C-NMR}$  (right) spectra of **2a**.

## 8.2.2 Control Experiments and Generality Discussion

**Table S1** The control experiments (photooxidation of **1a**).

**1a** + O<sub>2</sub>  $\xrightarrow[\text{Blue LED lamp (460 nm)}]{\text{COF, Solvent, RT}}$  **2a**

| Entry | Solvent | Light     | Catalyst | O <sub>2</sub> | Time (h) | Yield (%)                           |
|-------|---------|-----------|----------|----------------|----------|-------------------------------------|
| 1     | EtOH    | 460 nm    | DPP- COF | √              | 11       | 94 <sup>[a]</sup> 90 <sup>[b]</sup> |
| 2     | EtOH    | 460 nm    | DPP- COF | -              | 11       | 0 <sup>[a]</sup>                    |
| 3     | EtOH    | -         | DPP- COF | √              | 11       | 0 <sup>[a]</sup>                    |
| 4     | EtOH    | 460 nm    | -        | √              | 11       | 0 <sup>[a]</sup>                    |
| 5     | MeCN    | 460 nm    | DPP- COF | √              | 11       | 90 <sup>[a]</sup>                   |
| 6     | MeOH    | 460 nm    | DPP- COF | √              | 11       | 93 <sup>[a]</sup>                   |
| 7     | EtOH    | White LED | DPP- COF | √              | 11       | 33 <sup>[a]</sup>                   |
| 8     | EtOH    | 520 nm    | DPP- COF | √              | 11       | 3 <sup>[a]</sup>                    |

<sup>[a]</sup> Yields were determined by <sup>1</sup>H-NMR spectra. <sup>[b]</sup> Isolated yield.

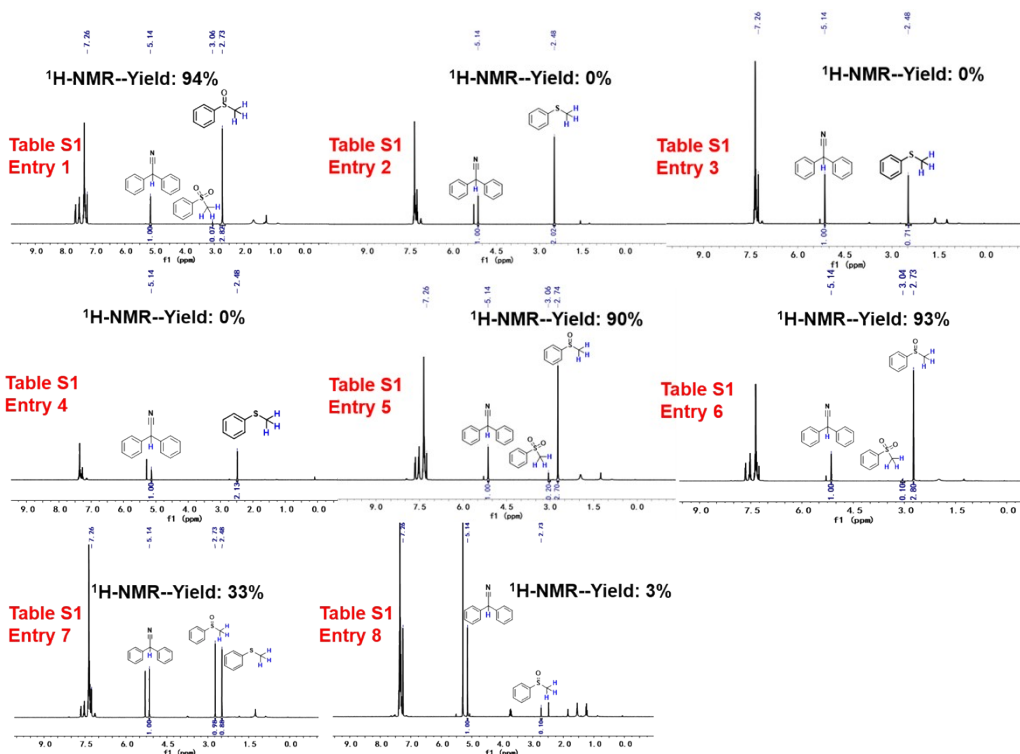

**Fig. S11** Corresponding <sup>1</sup>H-NMR spectra of the control experiments (Table S1) with DPAT as internal standard.

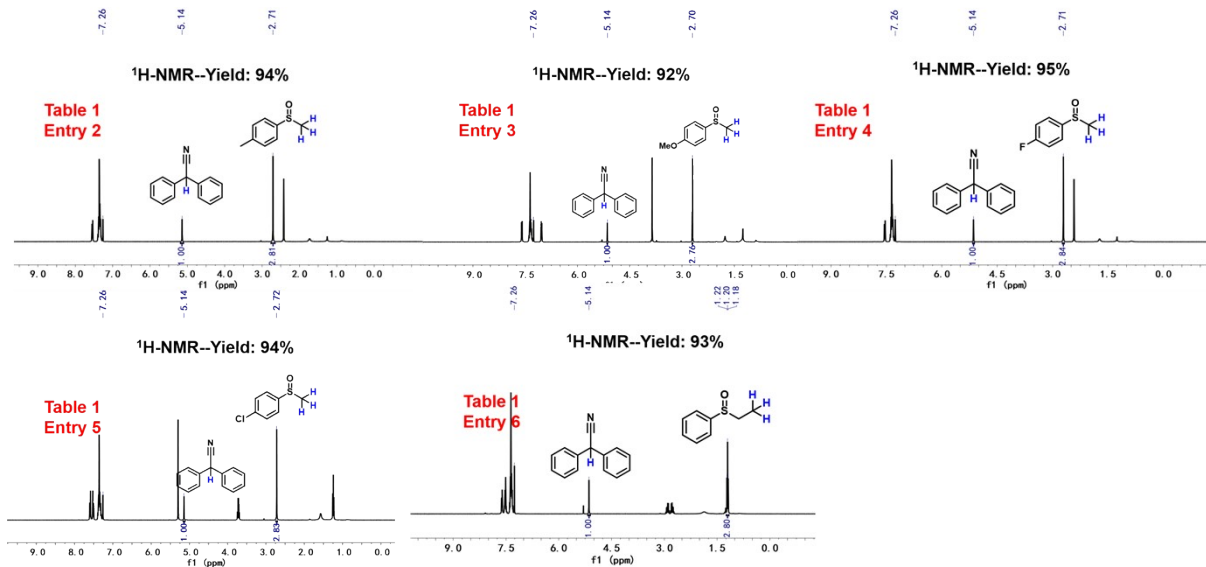

**Fig. S12** Yield of **2b-2f** catalyzed by DPP-COF determined by  $^1\text{H-NMR}$  with DPAT as internal standard.

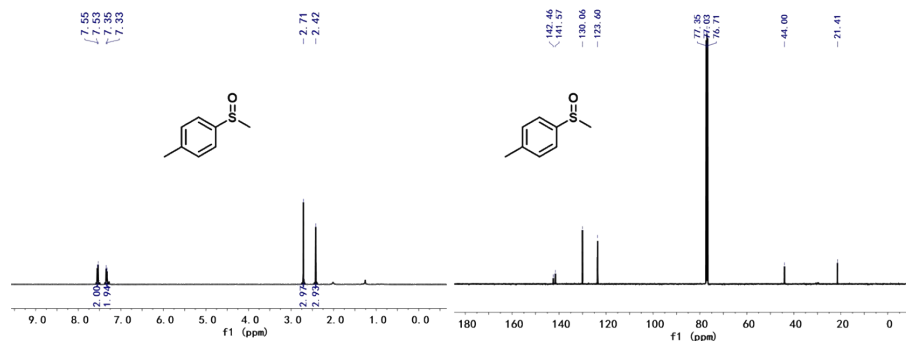

**Fig. S13**  $^1\text{H-NMR}$  (left) and  $^{13}\text{C-NMR}$  (right) spectra of **2b**.

**Isolated 2b:**  $^1\text{H-NMR}$  ( $\text{CDCl}_3$ , 400 MHz):  $\delta$  (ppm) 7.55-7.53 (d,  $J = 8.0$  Hz, 2H), 7.35-7.33 (d,  $J = 8.0$  Hz, 2H), 2.71 (s, 3H), 2.42 (s, 3H).  $^{13}\text{C-NMR}$  ( $\text{CDCl}_3$ , 100 MHz):  $\delta$  (ppm) 142.46, 141.57, 130.06, 123.60, 44.00, 21.41.

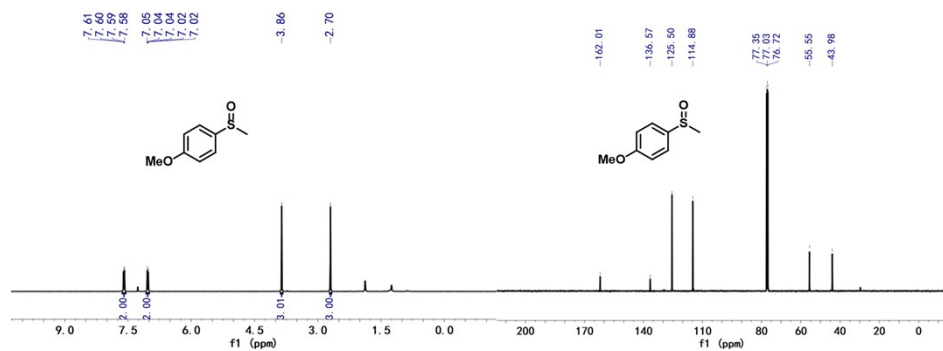

**Fig. S14**  $^1\text{H}$ -NMR (left) and  $^{13}\text{C}$ -NMR (right) spectra of **2c**.

**Isolated 2c** :  $^1\text{H}$ -NMR ( $\text{CDCl}_3$ , 400 MHz):  $\delta$  (ppm) 7.61-7.58 (m, 2H), 7.05-7.02 (m, 2H), 3.86 (s, 3H), 2.70 (s, 3H).  $^{13}\text{C}$ -NMR ( $\text{CDCl}_3$ , 100 MHz):  $\delta$  (ppm) 162.01, 136.57, 125.50, 114.88, 55.55, 43.98.

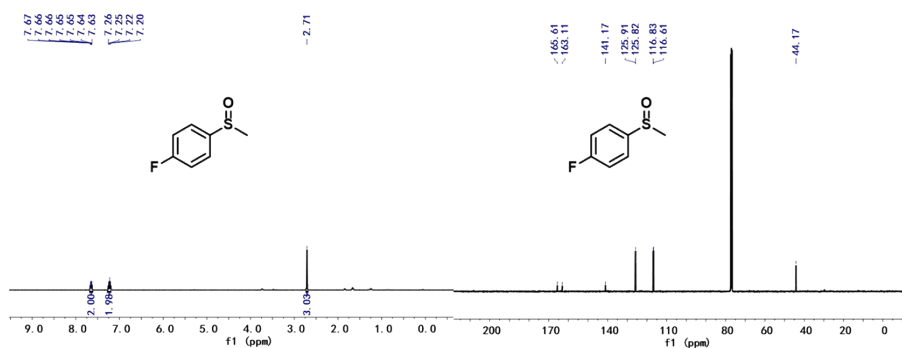

**Fig. S15**  $^1\text{H}$ -NMR (left) and  $^{13}\text{C}$ -NMR (right) spectra of **2d**.

**Isolated 2d** :  $^1\text{H}$ -NMR ( $\text{CDCl}_3$ , 400 MHz):  $\delta$  (ppm) 7.67-7.63 (m, 2H), 7.26-7.20 (m, 2H), 2.71 (s, 3H).  $^{13}\text{C}$ -NMR ( $\text{CDCl}_3$ , 100 MHz):  $\delta$  (ppm) 165.61, 163.11, 141.17, 125.91, 125.82, 116.83, 116.61, 44.17.

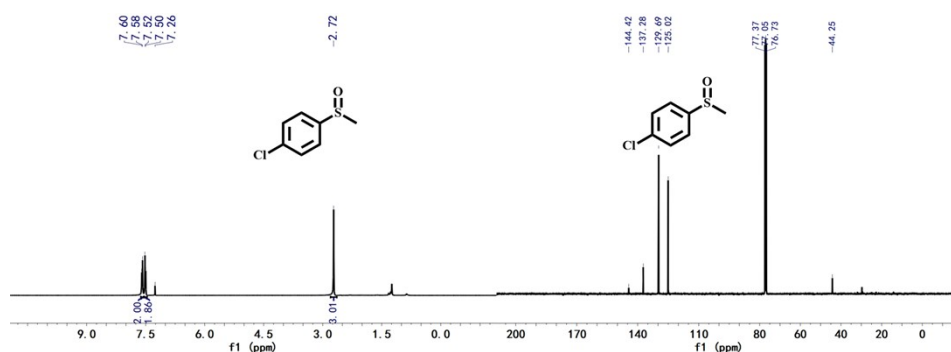

**Fig. S16**  $^1\text{H}$ -NMR (left) and  $^{13}\text{C}$ -NMR (right) spectra of **2e**.

**Isolated 2e:**  $^1\text{H-NMR}$  ( $\text{CDCl}_3$ , 400 MHz):  $\delta$  (ppm) 7.60-7.58 (d,  $J = 8.0$  Hz, 2H), 7.52-7.50 (d,  $J = 8.0$  Hz, 2H), 2.72 (s, 3H).  $^{13}\text{C-NMR}$  ( $\text{CDCl}_3$ , 100 MHz):  $\delta$  (ppm) 144.42, 137.28, 129.69, 125.02, 44.25.

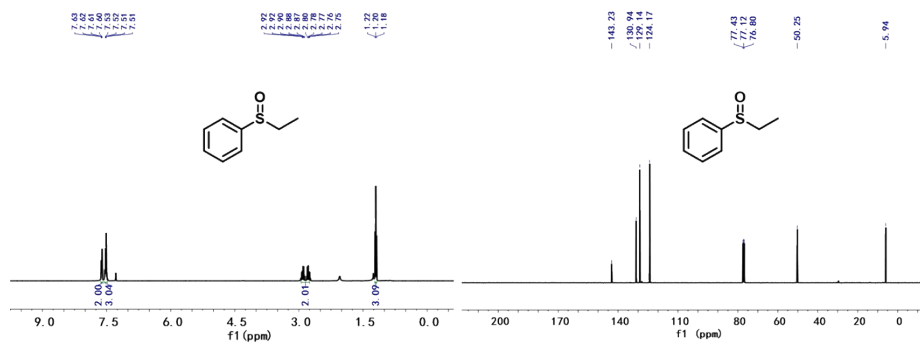

**Fig. S17**  $^1\text{H-NMR}$  (left) and  $^{13}\text{C-NMR}$  (right) spectra of **2f**.

**Isolated 2f:**  $^1\text{H-NMR}$  ( $\text{CDCl}_3$ , 400 MHz):  $\delta$  (ppm) 7.63-7.60 (m, 2H), 7.53-7.51 (m, 3H), 2.92-2.75 (m, 2H), 1.22-1.18 (t,  $J = 16.0$  Hz, 3H).  $^{13}\text{C-NMR}$ ( $\text{CDCl}_3$ ,100MHz):  $\delta$  (ppm) 143.23, 130.94, 129.14, 124.17, 50.25, 5.94.

### 8.3 Photocatalytic oxidation of THIQs

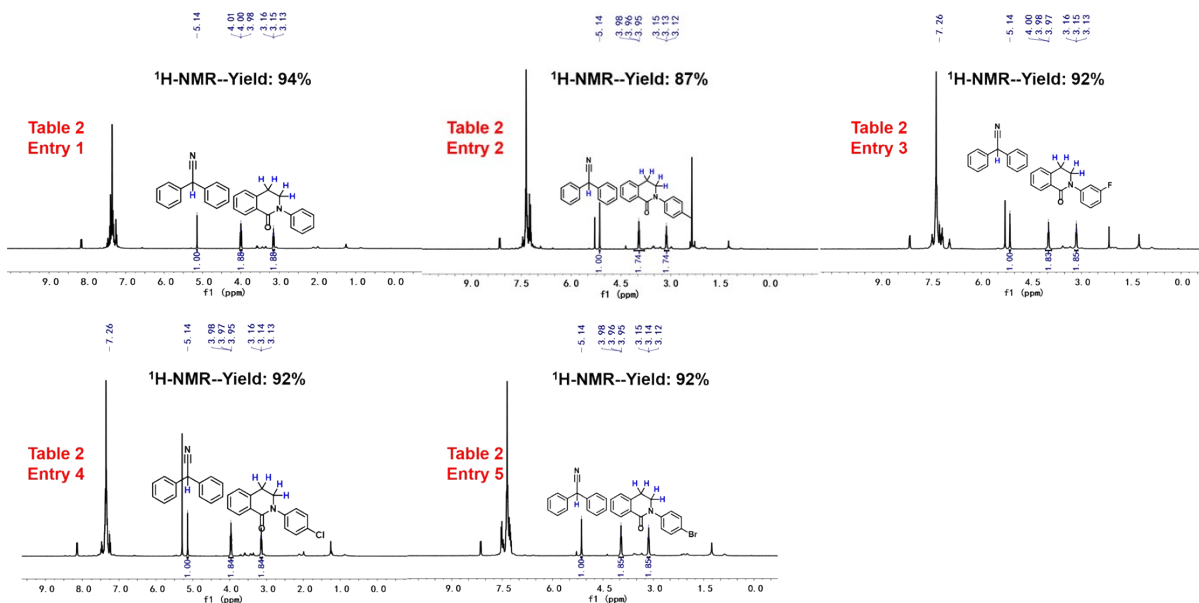

**Fig. S18** Yield of **4a-4e** catalyzed by DPP-COF determined by <sup>1</sup>H-NMR with DPAT as internal standard.

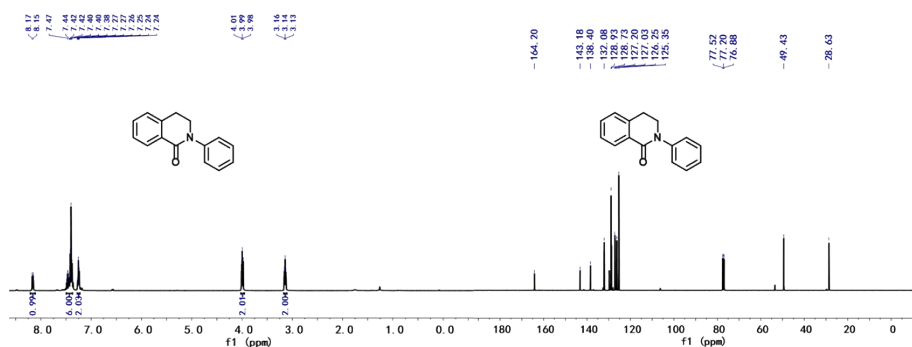

**Fig. S19** <sup>1</sup>H-NMR (left) and <sup>13</sup>C-NMR (right) spectra of **4a**.

**Isolated 4a** : <sup>1</sup>H-NMR (CDCl<sub>3</sub>, 400 MHz):  $\delta$  (ppm) 8.17-8.15 (dd,  $J$  = 8.0 Hz, 1H), 7.47-7.38 (m, 6H), 7.27-7.24 (d,  $J$  = 12.0 Hz, 2H), 4.01-3.98 (t,  $J$  = 12.0 Hz, 2H), 3.16-3.13 (t,  $J$  = 12.0 Hz, 2H). <sup>13</sup>C-NMR (CDCl<sub>3</sub>, 100 MHz):  $\delta$  (ppm) 164.20, 143.18, 138.40, 132.08, 128.93, 128.73, 127.20, 127.03, 126.25, 125.35, 49.43, 28.63.



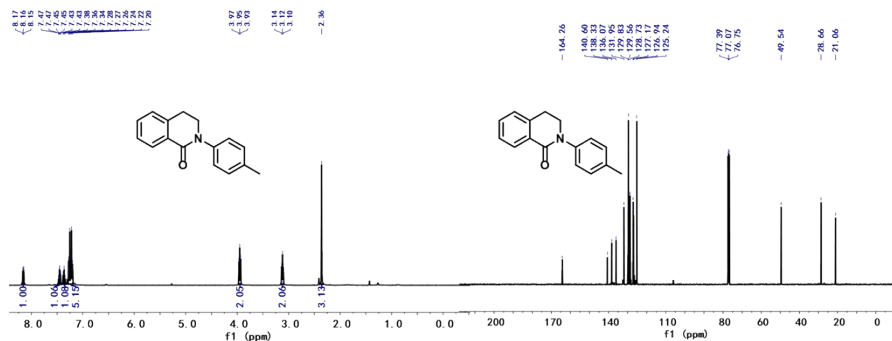

**Fig. S20**  $^1\text{H}$ -NMR (left) and  $^{13}\text{C}$ -NMR (right) spectra of **4b**.

**Isolated 4b** :  $^1\text{H}$ -NMR ( $\text{CDCl}_3$ , 400 MHz):  $\delta$  (ppm) 8.17-8.15 (d,  $J = 8.0$  Hz, 1H), 7.47-7.43 (t,  $J = 16.0$  Hz, 1H), 7.38-7.34 (t,  $J = 12.0$  Hz, 1H), 7.28-7.20 (m, 5H), 3.97-3.93 (m,  $J = 16.0$  Hz, 2H), 3.14-3.10 (t,  $J = 16.0$  Hz, 2H), 2.36 (s, 3H).  $^{13}\text{C}$ -NMR ( $\text{CDCl}_3$ , 100MHz):  $\delta$  (ppm) 164.26, 140.60, 138.33, 136.07, 131.95, 129.83, 129.56, 128.73, 127.17, 126.94, 125.24, 49.54, 28.66, 21.06.

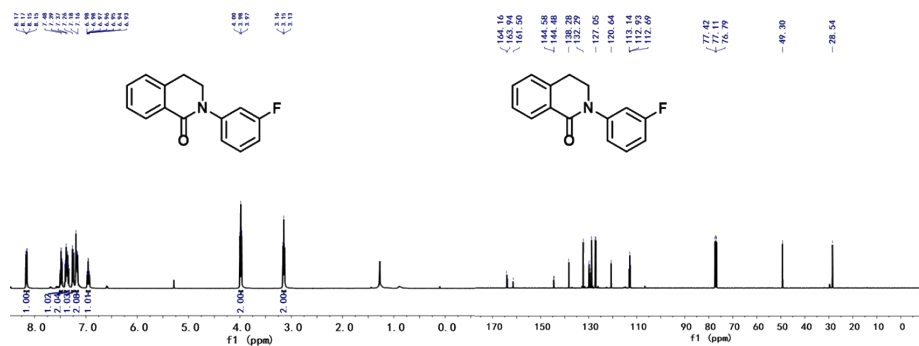

**Fig. S21**  $^1\text{H}$ -NMR (left) and  $^{13}\text{C}$ -NMR (right) spectra of **4c**.

**Isolated 4c** :  $^1\text{H}$ -NMR ( $\text{CDCl}_3$ , 400 MHz):  $\delta$  (ppm) 8.17-8.15 (dd,  $J = 8.0$  Hz, 1H), 7.50-7.46 (m, 1H), 7.40-7.34 (m, 2H), 7.26-7.24 (m, 1H), 7.19-7.16 (m, 2H), 6.98-6.13 (m, 1H), 4.00-3.97 (t,  $J = 12.0$  Hz, 2H), 3.16-3.13 (t,  $J = 12.0$  Hz, 2H).  $^{13}\text{C}$ -NMR ( $\text{CDCl}_3$ , 100MHz):  $\delta$  (ppm) 164.16, 163.94, 161.50, 144.58, 144.48, 138.28, 132.29, 127.05, 120.64, 113.14, 112.93, 112.69, 49.30, 28.54.

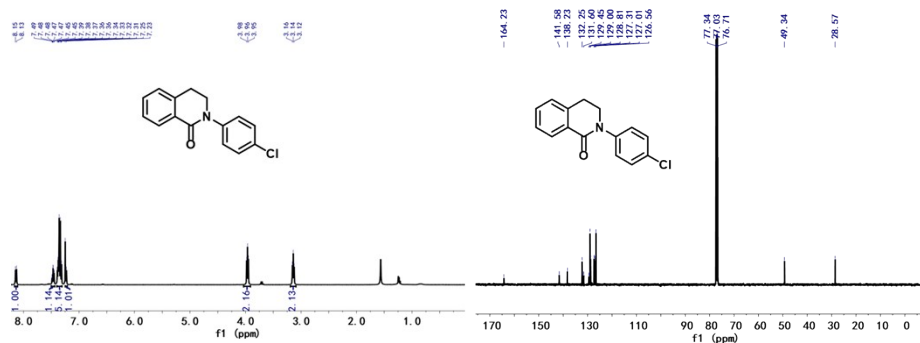

**Fig. S22**  $^1\text{H-NMR}$  (left) and  $^{13}\text{C-NMR}$  (right) spectra of **4d**.

**Isolated 4d:**  $^1\text{H-NMR}$  ( $\text{CDCl}_3$ , 400 MHz):  $\delta$  (ppm) 8.15-8.13 (d,  $J = 8.0$  Hz, 1H), 7.49-7.45 (m, 1H), 7.39-7.31 (m, 5H), 7.25-7.23 (d,  $J = 8.0$  Hz, 1H), 3.98-3.95 (t,  $J = 12.0$  Hz, 2H), 3.16-3.12 (t,  $J = 16.0$  Hz, 2H).  $^{13}\text{C-NMR}$  ( $\text{CDCl}_3$ , 100 MHz):  $\delta$  (ppm) 164.23, 141.58, 138.23, 132.25, 131.60, 129.45, 129.00, 128.81, 127.31, 127.01, 126.56, 49.34, 28.57.

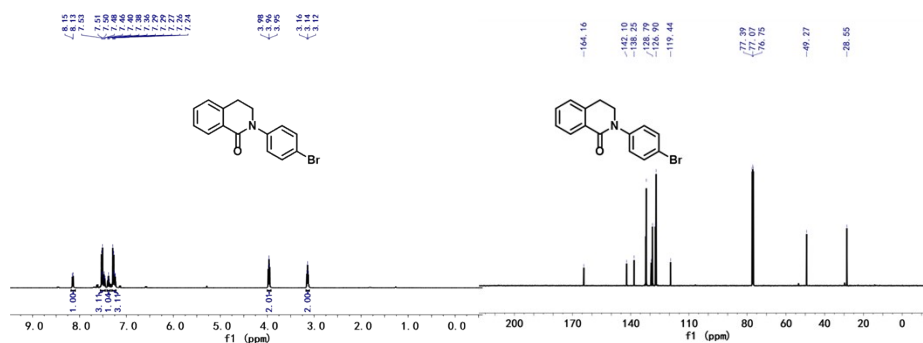

**Fig. S23**  $^1\text{H-NMR}$  (left) and  $^{13}\text{C-NMR}$  (right) spectra of **4e**.

**Isolated 4e:**  $^1\text{H-NMR}$  ( $\text{CDCl}_3$ , 400 MHz):  $\delta$  (ppm) 8.15-8.13 (d,  $J = 8.0$  Hz, 1H), 7.53-7.46 (m, 3H), 7.40-7.36 (m, 1H), 7.29-7.24 (m, 3H), 3.98-3.95 (t,  $J = 12.0$  Hz, 2H), 3.16-3.12 (t,  $J = 16.0$  Hz, 2H).  $^{13}\text{C-NMR}$  ( $\text{CDCl}_3$ , 100 MHz):  $\delta$  (ppm) 164.16, 142.10, 138.25, 128.79, 126.90, 119.44, 49.27, 28.55.

**Table S2 The control experiments (Photooxidation of 3a).**

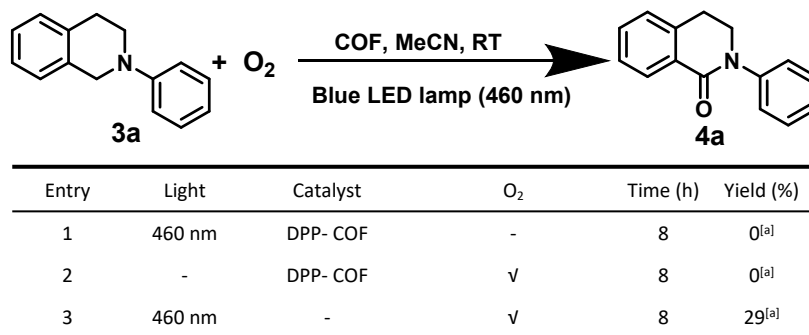

<sup>[a]</sup> Yields were determined by <sup>1</sup>H-NMR spectra.

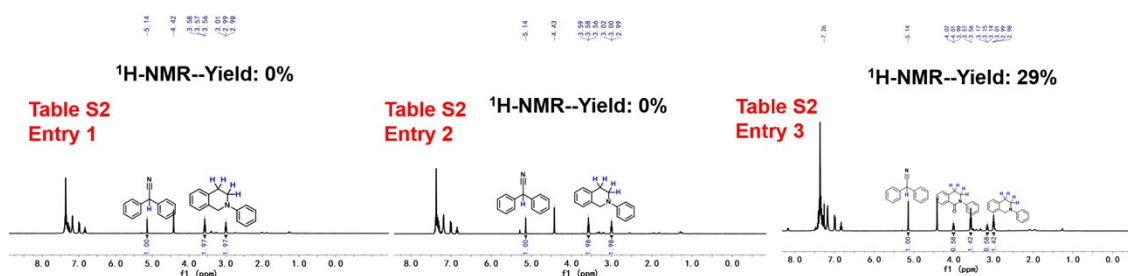

**Fig. S24** Yield of **4a** in the control experiments determined by <sup>1</sup>H-NMR.

## 8.4 Comparison of DPP-COF and Reported High-performing COFs

**Table S3 The performance of different COFs in the photooxidation of sulfides.<sup>1-12</sup>**

| Entry | Substrates (1a) | COF               | Light Source / Time | Yield | Conv. | Sel. | Ref.             |
|-------|-----------------|-------------------|---------------------|-------|-------|------|------------------|
|       |                 |                   |                     | (%)   | (%)   | (%)  |                  |
| 1     | 0.3 mmol        | DPP-COF (10 mg)   | 10 W blue LED/11 h  | 94    |       |      | <b>This Work</b> |
| 2     | 0.3 mmol        | BI-COF-1 (8 mg)   | 300 W Xe lamp/8 h   |       | 100   | 92   | 1                |
| 3     | 0.1 mmol        | En-COF-P (5 mg)   | 30 W blue LED/9 h   |       | 99    | 99   | 2                |
| 4     | 0.1 mmol        | TpBpy-COF (5 mg)  | Blue LED/6 h        |       | 99.9  | 99.9 | 3                |
| 5     | 0.11 mol        | PDI-PDA (6 mg)    | 410-420 nm LED/4 h  | 90.4  |       |      | 4                |
| 6     | 0.3 mmol        | BSe-COF (10 mg)   | 9 W blue LED/8 h    | 95    |       |      | 5                |
| 7     | 0.1 mmol        | COF-NUST-1 (4 mg) | 30 W blue LED/4 h   |       | 99    | 98   | 6                |
| 8     | 0.15 mmol       | TPDH-PTBA (5 mg)  | Blue LED/12 h       |       | 99    |      | 7                |

|    |           |                      |                    |    |    |    |
|----|-----------|----------------------|--------------------|----|----|----|
| 9  | 0.5 mmol  | TBPA-COF (5 mg)      | Blue LED/1.2 h     | 91 | 98 | 8  |
| 10 | 0.3 mmol  | R-DTP-COF-QA (12 mg) | Red LED/16 h       | 94 |    | 9  |
| 11 | 0.2 mmol  | PyPor-COF (1 mg)     | 5W red LED/24 h    | 99 |    | 10 |
| 12 | 0.05 mmol | CuPor-Dha (10 mg)    | Blue LED /10 h     | 82 |    | 11 |
| 13 | 0.05 mmol | DhaTph-Zn (10 mg)    | 300 W Xe lamp/10 h | 82 | 99 | 12 |

**Table S4 The performance of different COFs in the photooxidation of THIQs.<sup>13-17</sup>**

| Entry | Substrates    | COF               | Light Source / Time | Yield (%) | Ref.             |
|-------|---------------|-------------------|---------------------|-----------|------------------|
| 1     | 3a (0.3 mmol) | DPP-COF (10 mg)   | 10 W blue LED/8 h   | 94        | <b>This Work</b> |
| 2     | 3b (0.3 mmol) | DPP-COF (10 mg)   | 10 W blue LED/8 h   | 87        | <b>This Work</b> |
| 3     | 3a (0.2 mmol) | 2D-COF-1 (8 mg)   | 40 W blue LED/12 h  | 90        | 13               |
| 4     | 3a (0.1 mmol) | COF-TCZ-O (3 mg)  | 30 W blue LED/16 h  | 83        | 14               |
| 5     | 3b (0.1 mmol) | TRO-OMe (2.5 mg)  | White LED/5 h       | 90        | 15               |
| 6     | 3a (0.1 mmol) | OZBT-COF (5 mg)   | 30 W blue LED/10 h  | 85        | 16               |
| 7     | 3a (0.1 mmol) | TEP-27FO (2.5 mg) | 40 W red LED/2 h    | 91        | 17               |

## 8.5 Recycling Experiments

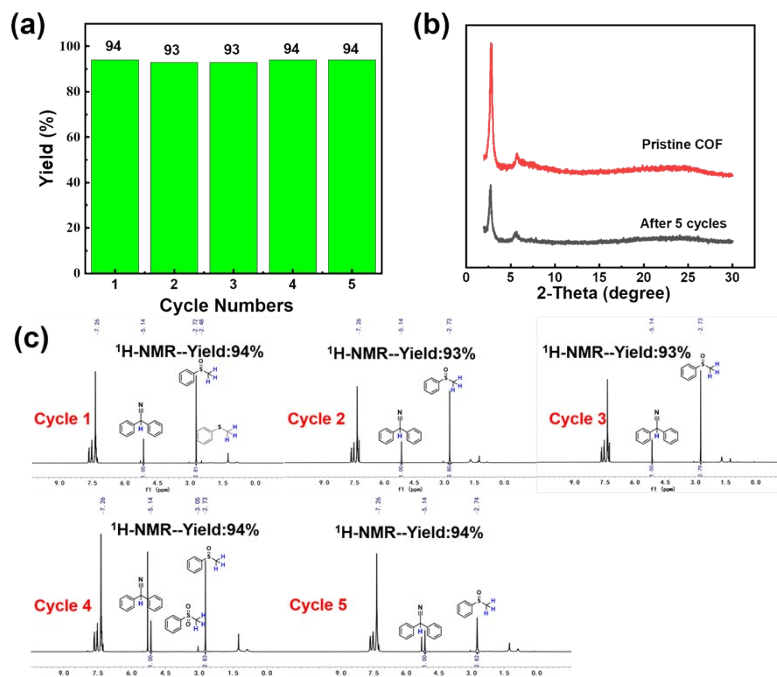

Fig. S25 (a, c) The recycle yields of 2a. (b) PXRD patterns after 5 cycles.

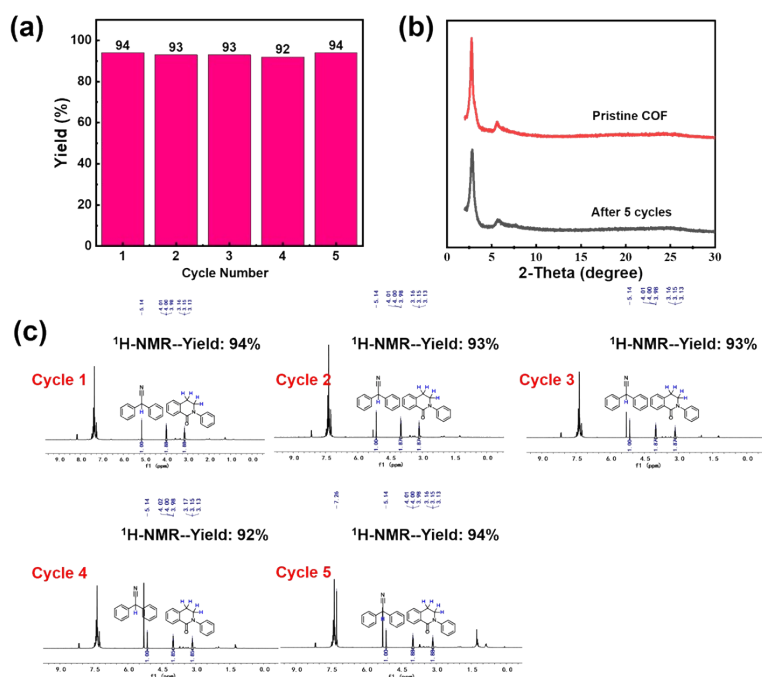

Fig. S26 (a, c) The recycle yields of 4a. (b) PXRD patterns after 5 cycles.

## 8.6 Quenching Experiments

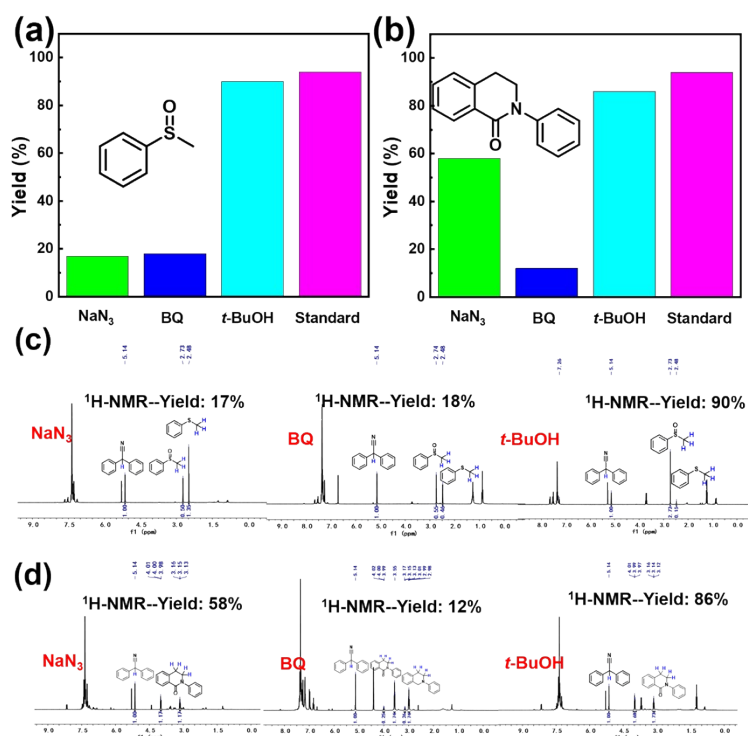

**Fig. S27** Quenching experiments and corresponding <sup>1</sup>H-NMR Yields of (a, c) 2a and (b, d) 4a in the presence of quenching agents. NaN<sub>3</sub>/BQ/*t*-BuOH = 0.3/0.3/0.3 equivalent of substrates, respectively.

## 9. Crystallographic Parameters

| DPP-COF    Space group: <i>P3</i>                                    |         |          |         |
|----------------------------------------------------------------------|---------|----------|---------|
| $a = 35.51 \text{ \AA}, b = 35.51 \text{ \AA}, c = 3.65 \text{ \AA}$ |         |          |         |
| $\alpha = 90^\circ, \beta = 90^\circ, \gamma = 120^\circ$            |         |          |         |
| Atom                                                                 | x       | y        | z       |
| N1                                                                   | 0.04312 | -0.97092 | 1.07869 |
| C2                                                                   | 0.01401 | -0.95679 | 1.07913 |
| C3                                                                   | 0.02841 | -0.91058 | 1.04128 |
| C4                                                                   | 0.06881 | -0.88216 | 0.934   |
| C5                                                                   | 0.08363 | -0.83638 | 0.85551 |
| S6                                                                   | 0.13458 | -0.8033  | 0.68798 |
| C7                                                                   | 0.12433 | -0.7611  | 0.69497 |
| C8                                                                   | 0.08312 | -0.77301 | 0.81869 |

|     |          |          |          |
|-----|----------|----------|----------|
| C9  | 0.05981  | -0.81589 | 0.91057  |
| C10 | 0.15676  | -0.71625 | 0.5845   |
| N11 | 0.20371  | -0.69705 | 0.60678  |
| C12 | 0.22082  | -0.65465 | 0.49355  |
| C13 | 0.18573  | -0.64695 | 0.39508  |
| C14 | 0.1476   | -0.68639 | 0.46222  |
| C15 | 0.17657  | -0.61708 | 0.27279  |
| N16 | 0.12962  | -0.63628 | 0.25051  |
| C17 | 0.11251  | -0.67868 | 0.36374  |
| C18 | 0.20901  | -0.57224 | 0.16232  |
| C19 | 0.25022  | -0.56032 | 0.0386   |
| C20 | 0.27352  | -0.51744 | -0.05328 |
| C21 | 0.2497   | -0.49696 | 0.00179  |
| S22 | 0.19875  | -0.53004 | 0.16931  |
| C23 | 0.26452  | -0.45117 | -0.07671 |
| C24 | 0.30493  | -0.42276 | -0.18399 |
| C25 | 0.31932  | -0.37655 | -0.22184 |
| N26 | 0.36241  | -0.34738 | -0.2214  |
| C27 | 0.22662  | -0.71921 | 0.7463   |
| C28 | 0.27587  | -0.68999 | 0.80077  |
| C29 | 0.29667  | -0.7164  | 0.93608  |
| C30 | 0.34507  | -0.68742 | 1.01832  |
| C31 | 0.10672  | -0.61413 | 0.11099  |
| C32 | 0.05746  | -0.64335 | 0.05652  |
| C33 | 0.03666  | -0.61693 | -0.07879 |
| C34 | -0.01174 | -0.64591 | -0.16102 |
| O35 | 0.07397  | -0.70552 | 0.36925  |
| O36 | 0.25937  | -0.62781 | 0.48804  |
| H37 | 0.00429  | -0.90082 | 1.07761  |
| H38 | 0.09198  | -0.89305 | 0.88709  |
| H39 | 0.0704   | -0.75149 | 0.85361  |
| H40 | 0.02722  | -0.83073 | 1.02003  |
| H41 | 0.26294  | -0.58185 | 0.00368  |
| H42 | 0.30611  | -0.5026  | -0.16274 |
| H43 | 0.24135  | -0.44028 | -0.0298  |
| H44 | 0.32904  | -0.43251 | -0.22032 |
| H45 | 0.22097  | -0.74628 | 0.56321  |
| H46 | 0.21172  | -0.73429 | 1.00891  |
| H47 | 0.282    | -0.66351 | 0.99212  |
| H48 | 0.292    | -0.67403 | 0.54559  |

|     |          |          |          |
|-----|----------|----------|----------|
| H49 | 0.29287  | -0.7414  | 0.73573  |
| H50 | 0.27924  | -0.73488 | 1.18056  |
| H51 | 0.36402  | -0.67514 | 0.76281  |
| H52 | 0.35719  | -0.70658 | 1.16623  |
| H53 | 0.3511   | -0.65887 | 1.1853   |
| H54 | 0.12161  | -0.59905 | -0.15162 |
| H55 | 0.11236  | -0.58705 | 0.29408  |
| H56 | 0.04134  | -0.65931 | 0.3117   |
| H57 | 0.05134  | -0.66983 | -0.13483 |
| H58 | 0.05409  | -0.59845 | -0.32327 |
| H59 | 0.04046  | -0.59194 | 0.12156  |
| H60 | -0.03068 | -0.6582  | 0.09449  |
| H61 | -0.01777 | -0.67446 | -0.328   |
| H62 | -0.02385 | -0.62676 | -0.30894 |

## 10. References

1. Q. Zhang, F. Zhang, J. Dong, M. Shao, M. Zhu, D. Wang, Y. Guo, J. Zhang and Y. Liu, *Chem. Mater.*, 2022, **34**, 6977-6984.
2. Z. Gu, J. Tian, Y. Li, H. Li, Y. Chai and X. Chi, *ACS Materials Letters*, 2024, **6**, 5292-5299.
3. T. Huang, J. Kou, H. Yuan, H. Guo, K. Yuan, H. Li, F. Wang and Z. Dong, *Adv. Funct. Mater.*, 2024, **n/a**, 2413943.
4. Z. Li, J. Jiao, W. Fu, K. Gao, X. Peng, Z. Wang, H. Zhuo, C. Yang, M. Yang, G. Chang, L. Yang, X. Zheng, Y. Yan, F. Chen, M. Zhang, Z. Meng and X. Shang, *Angew. Chem., Int. Ed.*, 2024, **63**, e202412977.
5. F. Yang, X. Li, H.-Y. Qu, J.-L. Kan, Y. Guo and Y.-B. Dong, *Chin. J. Chem.*, 2024, **42**, 1960-1966.
6. Z. Gu, J. Wang, Z. Shan, M. Wu, T. Liu, L. Song, G. Wang, X. Ju, J. Su and G. Zhang, *J. Mater. Chem. A*, 2022, **10**, 17624-17632.
7. Y. Hu, Y. Ji, Z. Qiao and L. Tong, *Microporous Mesoporous Mater.*, 2023, **362**, 112767.
8. F. Zhang, X. Ma, X. Dong, X. Miao and X. Lang, *Chem. Eng. J.*, 2023, **451**, 138802.
9. X. Kan, J.-C. Wang, Z. Chen, J.-Q. Du, J.-L. Kan, W.-Y. Li and Y.-B. Dong, *J. Am. Chem. Soc.*, 2022, **144**, 6681-6686.
10. K.-K. Niu, T.-X. Luan, J. Cui, H. Liu, L.-B. Xing and P.-Z. Li, *ACS Catal.*, 2024, **14**, 2631-



- 2641.
11. S. Suleman, X. Guan, Y. Zhang, A. Waseem, O. Metin, Z. Meng and H.-L. Jiang, *Chem. Eng. J.*, 2023, **476**, 146623.
  12. Y. Qian, D. Li, Y. Han and H.-L. Jiang, *J. Am. Chem. Soc.*, 2020, **142**, 20763-20771.
  13. S. Liu, M. Tian, X. Bu, H. Tian and X. Yang, *Chem. - Eur. J.*, 2021, **27**, 7738-7744.
  14. W. Wang, F. Meng, Y. Bai, Y. Lu, Q. Yang, J. Feng, Q. Su, H. Ren and Q. Wu, *ChemSusChem*, 2024, **17**, e202301916.
  15. M. Liu, J. Liu, J. Li, Z. Zhao, K. Zhou, Y. Li, P. He, J. Wu, Z. Bao, Q. Yang, Y. Yang, Q. Ren and Z. Zhang, *J. Am. Chem. Soc.*, 2023, **145**, 9198-9206.
  16. W. Wang, Y. Bai, Z. Li, Q. Su, B. Li, M. Lei, J. Feng, A. Xu and Q. Wu, *Chem. Eng. J.*, 2024, **501**, 157486.
  17. H. Zhang, T. Yuan, N. Zhumabay, Z. Ruan, H. Qian and M. Rueping, *Chem. Sci.*, 2024, **15**, 17435-17443.
